# Supplementary material
Source: MDPI journal article supplement (https://www.mdpi.com/2079-6412/9/1/18)
Supplement: s1 [file s1]

## Supplementary Materials

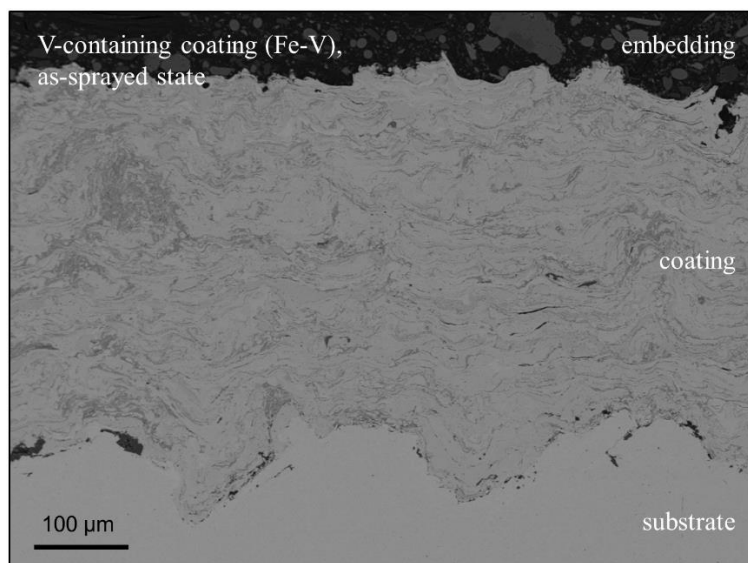

**Figure S1.** SEM image showing the cross section of the produced V-containing Fe-based coating.
